# Supplementary material
Source: publisher figshare collection journal article supplement (https://rs.figshare.com/ndownloader/files/8947126)
Supplement: Supplementary file 1 [file 8947126]

File	Genus	Species	Element	A	l	IAP	IML	yAP	yML	mass	TRI	beta	theta_norm	theta_perf	r	EMA	R	Fgrf	Fgrftoedness
MCZ7608_Anchitheriumclarenci_MTIII	Anchitherium	clarenci	MTIII	2.25013	21.7038	0.6935574	0.4500278	1.0906	0.9144	131.7	0.762889600932129	0	5	20	1.76873087537408	0.218497039088249	8.0949878440216	1290.66	510.994784915235
MCZNoNum_Archaeohippusblackbergi_MCIII	Archaeohippus	blackbergi	MCIII	0.33286	10.4364	0.019746	0.0133481	0.4499	0.372	20	0.713390501319261	0	5	20	0.786471106244328	0.134356340101698	5.85362109185934	196	80.7654253873335
MCZNoNum_Archaeohippusblackbergi_MTIII	Archaeohippus	blackbergi	MTIII	0.63128	12.9636	0.0671449	0.0525105	0.5708	0.5349	20	0.713390501319261	0	5	20	0.786471106244328	0.134356340101698	5.85362109185934	196	80.7654253873335
MCZ7283_Archaeohippusnanus_MTIII	Archaeohippus	nanus	MTIII	0.49469	11.0916	0.0449303	0.0285704	0.5295	0.4329	20	0.713390501319261	0	5	20	0.786471106244328	0.134356340101698	5.85362109185934	196	80.7654253873335
MCZ7283_Archaeohippusnanus_MCIII	Archaeohippus	nanus	MCIII	0.51664	10.38936	0.0380114	0.0221194	0.5111	0.4158	20	0.713390501319261	0	5	20	0.786471106244328	0.134356340101698	5.85362109185934	196	80.7654253873335
UNSM128869-2109-90_Cormohipparionoccidentale_MCIII	Cormohipparion	occidentale	MCIII	2.82629	23.334472	1.0581132	0.8478429	1.1358	1.0169	151.3	0.526070833162854	0	5	20	1.87745965364349	0.226459669726908	8.29048128484667	1482.74	722.532963650018
MCZ13478_Equusniobrarensis_MTIII	Equus	niobrarensis	MTIII	6.08387	27.01692	4.8919639	4.4709647	1.6273	1.5573	350	0	0	5	20	2.69270720785331	0.281165468573576	9.57694848344676	3430	3430
MCZ17665_Hyracotheriumsp_MCIII	Hyracotherium	sp	MCIII	0.2909	5.06352	0.0089653	0.0087449	0.3808	0.3674	18	0.888664600647979	0	5	20	0.751635097095306	0.130753322255251	5.74849712520494	176.4	63.5142567606635
MCZ19205_Hyracotheriumvasacciense_MCIII	Hyracotherium	vasacciense	MCIII	0.18215	7.4718	0.0058195	0.0018342	0.3276	0.1996	9	0.888664600647979	0	5	20	0.557910009075018	0.109341995012757	5.10243122059302	88.2	31.7571283803318
MCZ6927B_Mesohippusbarbouri_MCIII	Mesohippus	barbouri	MCIII	0.54367	11.5596	0.0369557	0.0154932	0.5372	0.3617	47.7	0.760651944667317	0	5	20	1.14288564212614	0.168131918251321	6.79755310004717	467.46	185.40406889364
MCZ6927_Mesohippusbarbouri_MTIII	Mesohippus	barbouri	MTIII	0.58725	12.16836	0.0387258	0.0203283	0.5409	0.4265	47.7	0.760651944667317	0	5	20	1.14288564212614	0.168131918251321	6.79755310004717	467.46	185.40406889364
MCZ6927_Mesohippusbarbouri_MCIII	Mesohippus	barbouri	MCIII	0.65632	11.31444	0.0432364	0.0298066	0.559	0.4796	47.7	0.760651944667317	0	5	20	1.14288564212614	0.168131918251321	6.79755310004717	467.46	185.40406889364
FM705_Miohippusgidleyi_MTIII	Miohippus	gidleyi	MTIII	1.44614	16.823808	0.2253692	0.1477268	0.8304	0.6522	53.8	0.736747967479675	0	5	20	1.20358357480892	0.173434005077336	6.93972081352922	527.24	213.155798054168
FM1195_Miohippusgidleyi_MCIII	Miohippus	gidleyi	MCIII	0.87727	13.2574	0.1459385	0.0383905	0.7999	0.4855	53.8	0.736747967479675	0	5	20	1.20358357480892	0.173434005077336	6.93972081352922	527.24	213.155798054168
UNSM27860_Neohipparionaffine_MCIII	Neohipparion	affine	MCIII	2.44145	23.24649	0.8857433	0.6777173	1.0669	0.97	136.1	0.483151546547556	0	5	20	1.79390263436062	0.220357492844144	8.14087422763256	1333.78	678.318619689769
FM69506_Neohipparioncoloradense_MCIII	Neohipparion	coloradense	MCIII	1.77234	19.80504	0.491313	0.3827146	0.9356	0.9177	136.1	0.483151546547556	0	5	20	1.79390263436062	0.220357492844144	8.14087422763256	1333.78	678.318619689769
MCZ17876_Parahippusleonensis_MCIII	Parahippus	leonensis	MCIII	0.98189	15.12288	0.1386219	0.0993283	0.7147	0.5792	76.6	0.607029532539715	0	5	20	1.40106487302145	0.189986809127106	7.37453762952619	750.68	339.051478725148
MCZ17877_Parahippusleonensis_MTIII	Parahippus	leonensis	MTIII	1.40669	15.5216	0.2756004	0.2096065	0.7999	0.7275	76.6	0.607029532539715	0	5	20	1.40106487302145	0.189986809127106	7.37453762952619	750.68	339.051478725148
UNSM52297_Pliohippuspernix_MCIII	Pliohippus	pernix	MCIII	2.69241	17.8308	0.9436129	0.7966586	1.0757	1.0118	155.3	0.328586668728541	0	5	20	1.89864425608508	0.227989403200349	8.32777413964549	1521.94	918.395176653882
FM71001_Protohippusfloblairi_MCIII	Protohippus	floblairi	MCIII	1.56603	16.51338436	0.295267	0.2591801	0.8383	0.8031	161.5	0.587252562122701	0	5	20	1.93087455854819	0.230303712070568	8.38403576385494	1582.7	727.843766543999
FM71001B_Protohippusfloblairi_MCIII	Protohippus	floblairi	MCIII	1.58972	18.38966	0.3467951	0.3055028	0.8473	0.8011	161.5	0.587252562122701	0	5	20	1.93087455854819	0.230303712070568	8.38403576385494	1582.7	727.843766543999
UNSM128870_Protohippussimus_MCIII	Protohippus	simus	MCIII	1.63016	22.397466	0.3704374	0.2870775	0.8542	0.7721	161.5	0.587252562122701	0	5	20	1.93087455854819	0.230303712070568	8.38403576385494	1582.7	727.843766543999
UNSM128868-2113-90_Pseudhippariongratum_MCIII	Pseudhipparion	gratum	MCIII	1.28258	16.16456	0.2297404	0.1933644	0.763	0.7435	61	0.532561443108228	0	5	20	1.2703743104383	0.179146168292769	7.09127257671622	597.8	289.474299079237
MCZ63107_Tapirusbairdii_MCIII	Tapirus	bairdii	MCIII	2.87407	12.48624	2.0213047	0.3779812	1.5848	0.8311	250	0.789866666666667	0	5	20	2.32999010959642	0.257786961993225	9.03843271040859	2450	949.710564399421
MCZ63107_Tapirusbairdii_MTIII	Tapirus	bairdii	MTIII	2.83689	12.52212	2.1259039	0.4110239	1.5238	0.9818	250	0.789866666666667	0	5	20	2.32999010959642	0.257786961993225	9.03843271040859	2450	949.710564399421
MCZ13478_Eniobrarensis_MCIII	Equus	niobrarensis	MCIII	7.058488	23.031410376	8.24076	4.3701	2.03962	1.54178	350	0	0	5	20	2.69270720785331	0.281165468573576	9.57694848344676	3430	3430
